# Supplementary material for: Rhodols – synthesis, photophysical properties and applications as fluorescent probes
Source: Royal Society of Chemistry journal article supplement (doi:10.1039/c9cs00166b), 2019-01-01
Supplement: c9cs00166b1.pdf [file c9cs00166b1.pdf]

Supporting information

## Rhodols – synthesis, photophysical properties and applications as fluorescent probes

Yevgen M. Poronik, Kateryna V. Vygranenko, Dorota Gryko\* and Daniel T. Gryko\*

Institute of Organic Chemistry, Polish Academy of Sciences, Kasprzaka 44/52, 01-224 Warsaw, Poland  
E-mail: dtgryko@icho.edu.pl.

**Table S1.** Optical properties of substituted rhodol derivatives in PBS buffer.

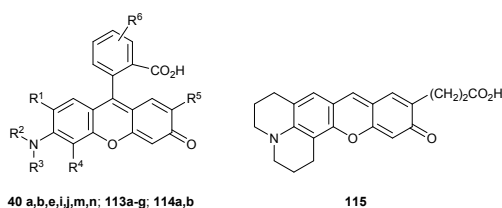

| Dye                      | R <sup>1</sup>                     | R <sup>2</sup>                     | R <sup>3</sup>                     | R <sup>4</sup> | R <sup>5</sup>  | R <sup>6</sup>    | $\lambda_{\text{abs}} / \text{nm}$ | $\epsilon_{\text{max}} \cdot 10^{-3} / \text{M}^{-1} \cdot \text{cm}^{-1}$ | $\lambda_{\text{em}} / \text{nm}$ | $\Phi$ |
|--------------------------|------------------------------------|------------------------------------|------------------------------------|----------------|-----------------|-------------------|------------------------------------|----------------------------------------------------------------------------|-----------------------------------|--------|
| <b>40a</b> <sup>1</sup>  | H                                  | H                                  | H                                  | H              | H               | H                 | 493                                | 70                                                                         | 516                               | 0.98   |
| <b>40b</b> <sup>1</sup>  | H                                  | C <sub>3</sub> H <sub>7</sub>      | H                                  | H              | H               | H                 | 507                                | 61                                                                         | 531                               | 0.94   |
| <b>40e</b> <sup>1</sup>  | H                                  | CH <sub>3</sub>                    | CH <sub>3</sub>                    | H              | H               | H                 | 518                                | 64                                                                         | 544                               | 0.20   |
| <b>40i</b> <sup>1</sup>  | H                                  | -(CH <sub>2</sub> ) <sub>4</sub> - |                                    | H              | H               | H                 | 519                                | 63                                                                         | 550                               | 0.12   |
| <b>40j</b> <sup>1</sup>  | H                                  | -(CH <sub>2</sub> ) <sub>5</sub> - |                                    | H              | H               | H                 | 523                                | 63                                                                         | 555                               | 0.10   |
| <b>113a</b> <sup>2</sup> | -(CH <sub>2</sub> ) <sub>3</sub> - |                                    | H                                  | H              | H               | CO <sub>2</sub> H | 516                                | 81                                                                         | 541                               | 0.79   |
| <b>113b</b> <sup>2</sup> | -(CH <sub>2</sub> ) <sub>3</sub> - |                                    | -(CH <sub>2</sub> ) <sub>3</sub> - |                | H               | CO <sub>2</sub> H | 540                                | 67                                                                         | 570                               | 0.43   |
| <b>40m</b> <sup>1</sup>  | H                                  | C <sub>6</sub> H <sub>5</sub>      | H                                  | H              | H               | H                 | 513                                | 55                                                                         | -                                 | -      |
| <b>40n</b> <sup>1</sup>  | H                                  | C <sub>6</sub> H <sub>5</sub>      | CH <sub>3</sub>                    | H              | H               | H                 | 517                                | 57                                                                         | -                                 | -      |
| <b>40p</b> <sup>1</sup>  | H                                  |                                    | H                                  | H              | H               | H                 | 462/490                            | 30                                                                         | 525                               | 0.16   |
| <b>113c</b> <sup>2</sup> | Me                                 | Et                                 | H                                  | H              | Cl              | CO <sub>2</sub> H | 514                                | 81                                                                         | 539                               | 0.82   |
| <b>113d</b> <sup>2</sup> | -(CH <sub>2</sub> ) <sub>3</sub> - |                                    | -(CH <sub>2</sub> ) <sub>3</sub> - |                | Cl              | CO <sub>2</sub> H | 548                                | 75                                                                         | 575                               | 0.42   |
| <b>113e</b> <sup>2</sup> | Me                                 | Et                                 | H                                  | H              | CH <sub>3</sub> | CO <sub>2</sub> H | 510                                | 66                                                                         | 536                               | 0.89   |
| <b>113f</b> <sup>2</sup> | -(CH <sub>2</sub> ) <sub>3</sub> - |                                    | H                                  | H              | Cl              | CO <sub>2</sub> H | 524                                | 77                                                                         | 548                               | 0.72   |
| <b>113g</b> <sup>2</sup> | Me                                 | Et                                 | H                                  | H              | Br              | CO <sub>2</sub> H | 516                                | 81                                                                         | 539                               | 0.61   |
| <b>114a</b> <sup>1</sup> | Cl                                 | CH <sub>3</sub>                    | H                                  | H              | Cl              | H                 | 512                                | 71                                                                         | 533                               | 0.67   |
| <b>114b</b> <sup>1</sup> | Cl                                 | C <sub>6</sub> H <sub>5</sub>      | CH <sub>3</sub>                    | H              | Cl              | H                 | 520                                | 62                                                                         | -                                 | -      |
| <b>115</b> <sup>2</sup>  | -                                  |                                    |                                    |                |                 |                   | 538                                | 70                                                                         | 562                               | high   |

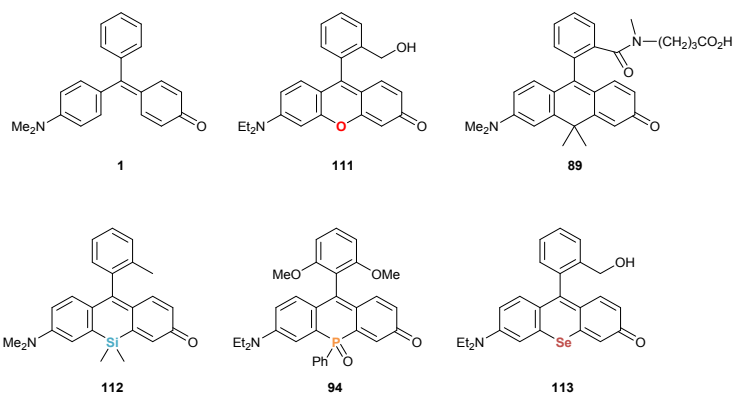

**Table S2.** Optical properties of rhodol and related compounds in PBS buffer.

| Dye        | $\lambda_{\text{abs}} / \text{nm}$ | $\lambda_{\text{em}} / \text{nm}$ | $\Phi$ | Bridging atom                         |
|------------|------------------------------------|-----------------------------------|--------|---------------------------------------|
| <b>1</b>   | 552 <sup>a</sup>                   | -                                 | -      | -                                     |
| <b>111</b> | 525                                | 543                               | 0.14   | <b>O</b>                              |
| <b>89</b>  | 586                                | 613                               | 0.32   | <b>C(CH<sub>3</sub>)<sub>2</sub></b>  |
| <b>112</b> | 612                                | 630                               | 0.28   | <b>Si(CH<sub>3</sub>)<sub>2</sub></b> |
| <b>94</b>  | 670                                | 698                               | 0.11   | <b>(P=O)Ph</b>                        |
| <b>113</b> | 558                                | 590                               | 0.006  | <b>Se</b>                             |

<sup>a</sup> – in methanol

## Literature:

- 1 T. Peng and D. Yang, *Org. Lett.*, 2010, **12**, 496–499.
- 2 J. E. Whitaker, R. P. Haugland, D. Ryan, P. C. Hewitt, R. P. Haugland and F. G. Prendergast, *Anal. Biochem.*, 1992, **207**, 267–279.
